# Supplementary material
Source: publisher site journal article supplement (https://www.spandidos-publications.com/6968/downloadSupplementary)
Supplement: Supplementary file 1 [file downloadSupplementary]

Table SI. Roles of ALKBH5 in human gastrointestinal tract cancers.

| A, Oesophageal cancer      |               |                   |              |                |                                                |         |                                                                                   |         |
|----------------------------|---------------|-------------------|--------------|----------------|------------------------------------------------|---------|-----------------------------------------------------------------------------------|---------|
| First author/s, year       | Expression    | Role in cancer    | Upstream     | Target         | Mechanism                                      | Readers | Biological function                                                               | (Refs.) |
| Xiao <i>et al</i> , 2021   | Downregulated | Tumour suppressor | -            | -              | -                                              | -       | Suppresses cell proliferation, migration and invasion                             | (91)    |
| Chen <i>et al</i> , 2021   | Downregulated | Tumour suppressor | -            | Pri-miR-194-2  | ALKBH5-miR-194-2-RAI1-Hippo pathway            | -       | Suppresses cell proliferation, migration and invasion                             | (92)    |
| Xue <i>et al</i> , 2021    | Downregulated | Tumour suppressor | miR-193a-3p↑ | Pri-miR-193-3p | miR-193-3p-ALKBH5 positive feedback loop       | -       | Suppresses cell proliferation, migration and invasion                             | (93)    |
| Qiao <i>et al</i> , 2023   | Upregulated   | Tumour suppressor | SHMT2↑       | C-myc↑         | SHMT2-METTTL3-FTO/ALKBH5-c-myc-IGF2BP2 pathway | IGF2BP2 | -                                                                                 | (94)    |
| Nagaki <i>et al</i> , 2020 | Upregulated   | Oncogene          | -            | CDKN1A (p21)↓  | ALKBH5-CDKN1A axis                             | -       | Promotes cell proliferation and migration, and accelerates cell cycle progression | (95)    |
| Wu <i>et al</i> , 2022     | Upregulated   | Oncogene          | -            | lncRNA CASC8↑  | ALKBH5-CASC8-hnRNPL-Bcl2/caspase3 pathway      | -       | Promotes cell proliferation                                                       | (96)    |
| B, Gastric cancer          |               |                   |              |                |                                                |         |                                                                                   |         |
| First author/s, year       | Expression    | Role in cancer    | Upstream     | Target         | Mechanism                                      | Readers | Biological function                                                               | (Refs.) |
| Zhang <i>et al</i> , 2019  | Upregulated   | Oncogene          | -            | lncRNA NEAT1↑  | ALKBH5-lncRNA NEAT1-EZH2 pathway               | -       | Promotes cell invasion and migration                                              | (84)    |

|                          |               |                   |              |                 |                                              |         |                                                       |         |
|--------------------------|---------------|-------------------|--------------|-----------------|----------------------------------------------|---------|-------------------------------------------------------|---------|
| Wang <i>et al</i> , 2021 | -             | Oncogene          | lncRNA NRON↑ | Nanog↑          | lncRNA NRON-ALKBH5-Nanog pathway             | -       | Promotes cell proliferation                           | (85)    |
| Fang <i>et al</i> , 2022 | Upregulated   | Oncogene          | -            | lncRNA TP53TG1↓ | ALKBH5-lncRNA TP53TG1-CIP2A-PI3K/AKT pathway | -       | -                                                     | (104)   |
| Fang <i>et al</i> , 2023 | Upregulated   | Oncogene          | LINC00659↑   | JAK1↑           | LINC00659-ALKBH5-JAK1/STAT3-YTHDF2 pathway   | YTHDF2  | Promotes cell proliferation, migration and invasion   | (74)    |
| Chen <i>et al</i> , 2023 | Upregulated   | Oncogene          | -            | CHAC1↓          | ALKBH5-CHAC1-ROS pathway                     | -       | Promotes cell proliferation, migration and invasion   | (78)    |
| Wang <i>et al</i> , 2024 | Upregulated   | Oncogene          | -            | ZKSCAN3↑        | ALKBH5-ZKSCAN3-YTHDF2-VEGFA pathway          | YTHDF2  | Promotes cell migration and invasion                  | (102)   |
| Wang <i>et al</i> , 2024 | Upregulated   | Oncogene          | -            | circFOXP1↑      | ALKBH5-circFOXP1-miR-338-3p-SOX4 pathway     | -       | -                                                     | (105)   |
| Suo <i>et al</i> , 2024  | Upregulated   | Oncogene          | HSPA4↑       | CD58↓           | HSPA4-ALKBH5-CD58                            | -       | Inhibits the infiltration of CD8 <sup>+</sup> T cells | (106)   |
| Ji <i>et al</i> , 2023   | Downregulated | Tumour suppressor | -            | SLC7A2, CGB3↓   | ALKBH5-SLC7A2/CGB3 axis                      | -       | -                                                     | (101)   |
| Hu <i>et al</i> , 2022   | Downregulated | Tumour suppressor | -            | PKMYT1↑         | ALKBH5-PKMYT1-IGF2BP3 pathway                | IGF2BP3 | Suppresses cell invasion and migration                | (70)    |
| Wang <i>et al</i> , 2023 | Downregulated | Tumour suppressor | -            | YY1↑            | ALKBH5-YY1-YTHDF1-ATG4B pathway              | YTHDF1  | Suppresses cell proliferation, migration and invasion | (107)   |
| C, Colorectal cancer     |               |                   |              |                 |                                              |         |                                                       |         |
| First author/s,          | Expression    | Role in cancer    | Upstream     | Target          | Mechanism                                    | Readers | Biological function                                   | (Refs.) |

| year                      |               |                   |        |               |                                                                      |               |                                                                                        |       |
|---------------------------|---------------|-------------------|--------|---------------|----------------------------------------------------------------------|---------------|----------------------------------------------------------------------------------------|-------|
| Zhang <i>et al</i> , 2022 | Downregulated | Tumour suppressor | -      | PHF20↑        | ALKBH5-PHF20 axis                                                    | -             | Suppresses cell proliferation, migration and invasion                                  | (109) |
| Luo <i>et al</i> , 2023   | Downregulated | Tumour suppressor | -      | SLC7A11↑      | ALKBH5-SLC7A11 axis                                                  | -             | Suppresses cell proliferation and promotes cell ferroptosis                            | (110) |
| Ge <i>et al</i> , 2023    | Downregulated | Tumour suppressor | -      | CCL5↑         | ALKBH5-NF-κB-CCL5 pathway                                            | -             | Suppresses cell proliferation, migration and invasion                                  | (113) |
| Wu <i>et al</i> , 2021    | Downregulated | Tumour suppressor | -      | FOXO3↓        | ALKBH5-FOXO3- miR-21-SPRY2 pathway                                   | -             | Suppresses cell proliferation, migration and invasion                                  | (114) |
| Wu <i>et al</i> , 2023    | Downregulated | Tumour suppressor | HDAC2↑ | JMJD8↑        | METTL14/ALKBH5-JMJD8-IGF2BPs-PKM2 pathway                            | IGF2BPs       | Suppresses cell proliferation                                                          | (86)  |
| Ye <i>et al</i> , 2023    | Downregulated | Tumour suppressor | -      | HK2↑          | FTO/ALKBH5-HK2-IGF2BP2-FOXO1 pathway                                 | IGF2BP2       | Suppresses cell proliferation, migration and invasion                                  | (116) |
| Ye <i>et al</i> , 2023    | Downregulated | Tumour suppressor | -      | FABP5↓        | ALKBH5-FABP5-FASN-mTOR pathway                                       | -             | Suppresses cell proliferation, migration and invasion                                  | (87)  |
| Liu <i>et al</i> , 2024   | Downregulated | Tumour suppressor | p53    | lncRNA CARMN↓ | p53-ALKBH5-lncRNA CARMN-YTHDF2/YTHDF3-miR-5683-FGF2-Akt/mTOR pathway | YTHDF2/YTHDF3 | Suppresses cell proliferation and migration                                            | (118) |
| Feng <i>et al</i> , 2024  | Downregulated | Tumour suppressor | -      | Arg-1↑        | ALKBH5-Arg-1 axis                                                    | -             | Suppresses the progression of CRC by affecting the immunosuppressive function of MDSCs | (119) |
| Shao <i>et al</i> ,       | Upregulated   | -                 | -      | CircAFF2↑     | ALKBH5-circAFF2-                                                     | YTHDF2        | Increases the radiosensitivity of CRC                                                  | (117) |

|                             |               |                      |                |                  |                                                                                              |         |                                                                                |         |
|-----------------------------|---------------|----------------------|----------------|------------------|----------------------------------------------------------------------------------------------|---------|--------------------------------------------------------------------------------|---------|
| 2023                        |               |                      |                |                  | YTHDF2-CAND1-<br>Cullin1/NEDD8 pathway                                                       |         | cells                                                                          |         |
| Zhai <i>et al</i> ,<br>2023 | Upregulated   | Oncogene             | -              | AXIN2↓           | ALKBH5-AXIN2-<br>IGF2BP1-Wnt/β-catenin-<br>DKK1 pathway                                      | IGF2BP1 | Promotes cell proliferation                                                    | (61)    |
| Shen <i>et al</i> ,<br>2023 | Upregulated   | Oncogene             | -              | RAB5A↑           | ALKBH5-RAB5A-<br>YTHDF2 pathway                                                              | YTHDF2  | Promotes cell proliferation,<br>migration and invasion                         | (69)    |
| Guo <i>et al</i> ,<br>2020  | Upregulated   | Oncogene             | -              | lncRNA<br>NEAT1↑ | ALKBH5-lncRNA NEAT1<br>axis                                                                  | -       | Promotes cell proliferation and<br>migration, and suppresses cell<br>apoptosis | (120)   |
| Sun <i>et al</i> ,<br>2024  | Upregulated   | Oncogene             | -              | CPT1A↑           | ALKBH5-CPT1A axis                                                                            | -       | Promotes cell proliferation,<br>migration and invasion                         | (127)   |
| Li <i>et al</i> ,<br>2023   | Upregulated   | Oncogene             | miR-140-<br>3p | BET1L↑           | Rs11245997-miR-140-3p-<br>METTL14/WTAP/ALKBH5<br>-BET1L-<br>HSD17B7/CYP27B1/COM<br>T pathway | -       | -                                                                              | (128)   |
| D, Hepatocellular carcinoma |               |                      |                |                  |                                                                                              |         |                                                                                |         |
| First<br>author/s,<br>year  | Expression    | Role in<br>cancer    | Upstream       | Target           | Mechanism                                                                                    | Readers | Biological function                                                            | (Refs.) |
| Chen <i>et al</i> ,<br>2020 | Downregulated | Tumour<br>suppressor | -              | LYPD1↑           | ALKBH5-LYPD1-IGF2BP1<br>pathway                                                              | IGF2BP1 | Suppresses cell proliferation,<br>migration and invasion                       | (67)    |
| Wang <i>et al</i> ,<br>2023 | Downregulated | Tumour<br>suppressor | -              | PAQR4↑           | ALKBH5-PAQR4-<br>IGF2BP1-PI3K/AKT                                                            | IGF2BP1 | Suppresses cell proliferation,<br>migration and invasion                       | (73)    |

|                               |                                                       |                   |                |                       |                                                     |         |                                                                     |       |
|-------------------------------|-------------------------------------------------------|-------------------|----------------|-----------------------|-----------------------------------------------------|---------|---------------------------------------------------------------------|-------|
|                               |                                                       |                   |                |                       | pathway                                             |         |                                                                     |       |
| Zhang <i>et al</i> , 2022     | Downregulated                                         | Tumour suppressor | -              | lncRNA LINC02551<br>↑ | ALKBH5-lncRNA LINC02551-DDX24 pathway               | IGF2BP1 | -                                                                   | (131) |
| Wang <i>et al</i> , 2022      | Downregulated (non-alcoholic fatty liver disease-HCC) | Tumour suppressor | -              | lncRNA LINC01468<br>↑ | ALKBH5-lncRNA LINC01468-SHIP2-PI3K/AKT/mTOR pathway | -       | -                                                                   | (133) |
| Zhao <i>et al</i> , 2022      | Downregulated                                         | Tumour suppressor | -              | UBR7↓                 | ALKBH5-UBR7-Keap1-Nrf2-Bach1-HK2 pathway            | -       | -                                                                   | (134) |
| You <i>et al</i> , 2022       | Upregulated                                           | Oncogene          | -              | MAP3K8↑               | ALKBH5-MAP3K8-YTHDF2-JNK/ERK pathway                | YTHDF2  | Promotes cell proliferation, migration and invasion                 | (88)  |
| Chang <i>et al</i> , 2024     | Upregulated                                           | Oncogene          | -              | TTI1↑                 | ALKBH5-TTI1 axis                                    | -       | Promotes cell proliferation, migration and invasion                 | (130) |
| Liu <i>et al</i> , 2020       | -                                                     | Oncogene          | CircRNA cIARS↑ | -                     | CircRNA cIARS-ALKBH5 axis                           | -       | Suppresses cell ferroptosis and autophagy under sorafenib treatment | (135) |
| Adjibade <i>et al</i> , 2024  | -                                                     | -                 | -              | ATF4↑                 | ALKBH5/FTO-ATF4 axis                                | -       | Promotes resistance to sorafenib treatment of HCC cells             | (136) |
| Yeermaike <i>et al</i> , 2022 | Upregulated                                           | Oncogene          | -              | lncRNA NEAT1↑         | ALKBH5-lncRNA NEAT1-miR-214-PSMB8 pathway           | -       | Promotes cell migration                                             | (137) |
| Chen <i>et al</i> , 2021      | Upregulated                                           | Oncogene          | lncRNA CASC11↑ | UBE2T↑                | lncRNA CASC11-ALKBH5-UBE2T-YTHDF2 pathway           | YTHDF2  | -                                                                   | (80)  |
| Liu <i>et al</i> ,            | -                                                     | Oncogene          | -              | Circ-CCT3↑            | ALKBH5/METTL3-circ-                                 | YTHDF2  | -                                                                   | (138) |

|                                    |                       |                   |          |            |                                        |         |                                                                    |         |
|------------------------------------|-----------------------|-------------------|----------|------------|----------------------------------------|---------|--------------------------------------------------------------------|---------|
| 2023                               |                       |                   |          |            | CCT3-YTHDF2-miR-378a-3p-FLT-1 pathway  |         |                                                                    |         |
| Chen <i>et al</i> , 2022           | Upregulated           | Oncogene          | -        | CircCPSF6↑ | ALKBH5-circCPSF6-YTHDF2-YAP1 pathway   | YTHDF2  | -                                                                  | (139)   |
| Meng <i>et al</i> , 2024           | Upregulated (HBV-HCC) | Oncogene          | -        | SNAI2↑     | ALKBH5-SNAI2-YTHDF2 pathway            | YTHDF2  | Promotes stemness maintenance and self-renewal in HBV-positive HCC | (141)   |
| Qu <i>et al</i> , 2021             | Upregulated (HBV-HCC) | Oncogene          | WDR5↑    | HBx↑       | HBx-WDR5-ALKBH5 positive feedback loop | -       | Promotes cell proliferation and migration                          | (143)   |
| E, Intrahepatic cholangiocarcinoma |                       |                   |          |            |                                        |         |                                                                    |         |
| First author/s, year               | Expression            | Role in cancer    | Upstream | Target     | Mechanism                              | Readers | Biological function                                                | (Refs.) |
| Gao <i>et al</i> , 2024            | Upregulated           | Oncogene          | -        | BUB1B↑     | ALKBH5-BUB1B axis                      | -       | Promotes cell proliferation and stemness maintenance               | (145)   |
| Qiu <i>et al</i> , 2021            | Upregulated           | Oncogene          | -        | PD-L1↑     | ALKBH5-PD-L1-YTHDF2 pathway            | YTHDF2  | Inhibits T-cell-mediated antitumour immunity                       | (146)   |
| F, Gallbladder cancer              |                       |                   |          |            |                                        |         |                                                                    |         |
| First author/s, year               | Expression            | Role in cancer    | Upstream | Target     | Mechanism                              | Readers | Biological function                                                | (Refs.) |
| Wu <i>et al</i> , 2024             | Downregulated         | Tumour suppressor | TGF-β1↑  | FOXA1↓     | TGF-β1-ALKBH5-FOXA1 pathway            | -       | -                                                                  | (149)   |
| G, Pancreatic cancer               |                       |                   |          |            |                                        |         |                                                                    |         |
| First author/s, year               | Expression            | Role in cancer    | Upstream | Target     | Mechanism                              | Readers | Biological function                                                | (Refs.) |

| year                      |               |                   |   |                    |                                                                         |         |                                                                                                     |       |
|---------------------------|---------------|-------------------|---|--------------------|-------------------------------------------------------------------------|---------|-----------------------------------------------------------------------------------------------------|-------|
| Tang <i>et al</i> , 2020  | Downregulated | Tumour suppressor | - | WIF-1↑             | ALKBH-WIF-1-Wnt pathway                                                 | -       | Suppresses cell proliferation, migration and invasion, and improves the sensitivity to chemotherapy | (75)  |
| Lin <i>et al</i> , 2022   | Downregulated | Tumour suppressor | - | lncRNA SH3BP5-AS1↑ | ALKBH5-lncRNA SH3BP5-AS1-IGF2BP1-miR-139-5p-CTBP1-Wnt/β-catenin pathway | IGF2BP1 | -                                                                                                   | (89)  |
| Zhang <i>et al</i> , 2022 | Downregulated | Tumour suppressor | - | lncRNA DDIT4-AS1↑  | ALKBH5-lncRNA DDIT4-AS1-UPF1-DDIT4-mTOR pathway                         | -       | -                                                                                                   | (77)  |
| Guo <i>et al</i> , 2020   | Downregulated | Tumour suppressor | - | PER1↓              | ALKBH5-PER1-YTHDF2-ATM-P53-ALKBH5 loop                                  | YTHDF2  | Suppresses cell proliferation, migration and invasion                                               | (79)  |
| He <i>et al</i> , 2018    | Downregulated | Tumour suppressor | - | lncRNA KCNK15-AS1↓ | ALKBH5-lncRNA KCNK15-AS1 axis                                           | -       | Suppresses cell migration and invasion                                                              | (154) |
| He <i>et al</i> , 2021    | Downregulated | Tumour suppressor | - | lncRNA KCNK15-AS1↓ | ALKBH5-lncRNA KCNK15-AS1-KCNK15/PTEN-AKT pathway                        | -       | -                                                                                                   | (90)  |
| Lai <i>et al</i> , 2022   | Downregulated | Tumour suppressor | - | CELF2↓             | ALKBH5-CELF2-YTHDF2-CD44-ERAD pathway                                   | YTHDF2  | -                                                                                                   | (155) |
| Huang <i>et al</i>        | Downregulated | Tumour            | - | FBXL5↓             | ALKBH5-FBXL5-                                                           | -       | Suppresses cell migration and                                                                       | (156) |

|                                      |                       |                |                 |        |                                                          |         |                                                     |         |
|--------------------------------------|-----------------------|----------------|-----------------|--------|----------------------------------------------------------|---------|-----------------------------------------------------|---------|
| <i>al</i> , 2021                     |                       | suppressor     |                 |        | IRP2/SNAI1 pathway                                       |         | invasion                                            |         |
| Liu <i>et al</i> , 2023              | Upregulated (hypoxia) | Oncogene       | HIF1 $\alpha$ ↑ | HDAC4↑ | ALKBH5-HDAC4-YTHDF2-HIF1 $\alpha$ positive feedback loop | YTHDF2  | Promotes cell proliferation and migration           | (72)    |
| H, Pancreatic neuroendocrine tumours |                       |                |                 |        |                                                          |         |                                                     |         |
| First author/s, year                 | Expression            | Role in cancer | Upstream        | Target | Mechanism                                                | Readers | Biological function                                 | (Refs.) |
| Chen <i>et al</i> , 2023             | Upregulated           | Oncogene       | -               | FABP5↑ | ALKBH5-FABP5-IGF2BP2-PI3K/AKT/mTOR pathway               | IGF2BP2 | Promotes cell proliferation, migration and invasion | (159)   |

HCC, hepatocellular carcinoma; HBV, hepatitis B virus; ALKBH5, AlkB homologue 5; lncRNA, long non-coding RNA; miR, microRNA; LINC, long-integrated non-coding; ERAD, endoplasmic reticulum-associated degradation; circRNA/circ, circular RNA; CRC, colorectal cancer; MDSC, myeloid-derived suppressor cell; ROS, reactive oxygen species.

Table SII. Small-molecule inhibitors of AlkB homologue 5.

| First author/s,<br>year                             | Inhibitor | Identification method                   | PDB code | IC <sub>50</sub> (method,<br>substrate)                               | Anticancer potency (cell lines)                                                                    | (Refs.)   |
|-----------------------------------------------------|-----------|-----------------------------------------|----------|-----------------------------------------------------------------------|----------------------------------------------------------------------------------------------------|-----------|
| Takahashi <i>et al</i> , 2022                       | Ena15     | Virtual screening                       | 4NRO     | 18.3±1.8 μM<br>(ELISA, ssDNA)                                         | Inhibits tumour growth and induces cell cycle arrest in GBM (LN229, KNS81, U87MG and U251MG cells) | (168)     |
|                                                     | Ena21     | Virtual screening                       | 4NRO     | 15.7±1.0 μM<br>(ELISA, ssDNA)                                         | Inhibits tumour growth and induces cell cycle arrest in GBM (LN229, KNS81, U87MG and U251MG cells) |           |
| Malacrida <i>et al</i> , 2020                       | MV1035    | -                                       | 4OCT     | -                                                                     | Inhibits cell migration and invasiveness of GBM (U87 cells)                                        | (171)     |
| Li <i>et al</i> , 2016;<br>Tang <i>et al</i> , 2022 | IOX1      | -                                       | -        | 2.9±0.3 μM (Top-Count NXT HTS, <sup>3</sup> H-m <sup>6</sup> A-ssRNA) | Slows tumour growth rate of GBM (U87 cells)                                                        | (172,173) |
| Li <i>et al</i> , 2020                              | ALK-04    | Virtual screening                       | 4NRO     | -                                                                     | Inhibits tumour growth of melanoma (B16 cells)                                                     | (170)     |
| Fang <i>et al</i> , 2022                            | 20m       | Virtual screening;<br>molecular docking | 4NRQ     | 0.021 μM (FP, ssRNA)                                                  | -                                                                                                  | (174)     |
| Feng <i>et al</i> , 2014                            | 2,4-PDCA  | Structural similarity<br>screening      | 4NRQ     | 347.2 μM (HPLC, ssDNA)                                                | -                                                                                                  | (40)      |
|                                                     | Citrate   | Structural similarity<br>screening      | 4O61     | 627.9 μM (HPLC, ssDNA)                                                | -                                                                                                  |           |
|                                                     | NOG       | Structural similarity<br>screening      | 4NRP     | 25.85 μM (HPLC, ssDNA)                                                | -                                                                                                  |           |
|                                                     | Succinate | Structural similarity<br>screening      | 4NPM     | 30.00 μM (HPLC, ssDNA)                                                | -                                                                                                  |           |

|                                |                                                             |                                                    |      |                           |                                                                                                                |       |
|--------------------------------|-------------------------------------------------------------|----------------------------------------------------|------|---------------------------|----------------------------------------------------------------------------------------------------------------|-------|
| Selberg <i>et al</i> ,<br>2021 | 2-[(1-hydroxy-2-oxo-2-phenylethyl)sulfanyl] acetic acid (3) | Virtual screening; molecular docking               | 4O61 | 0.84 $\mu$ M (ELISA, RNA) | Inhibits tumour growth of AML (HL-60, CCRF-CEM and K562 cells)                                                 | (169) |
|                                | 4-[(furan-2-yl)methyl] amino]-1,2-diazinane-3,6-dione (6)   | Virtual screening; molecular docking               | 4O61 | 1.79 $\mu$ M (ELISA, RNA) | Inhibits tumour growth of AML (HL-60, CCRF-CEM and K562 cells)                                                 |       |
| Wang <i>et al</i> ,<br>2023    | 8539-0746                                                   | Virtual screening                                  | 4NRO | 15.6 $\mu$ M (FP, ssDNA)  | -                                                                                                              | (176) |
|                                | DDO-2728                                                    | Virtual screening; optimization; molecular docking | 4NRO | 2.97 $\mu$ M (FP, ssDNA)  | Induces cell apoptosis, induced cell cycle arrest and inhibits tumour growth of AML (MOLM-13 and MV4-11 cells) |       |
| Komal <i>et al</i> ,<br>2023   | ZINC78774792                                                | Virtual screening; molecular docking               | 4NJ4 | -                         | -                                                                                                              | (177) |
|                                | ZINC00546946                                                | Virtual screening; molecular docking               | 4NJ4 | -                         | -                                                                                                              |       |

FP, fluorescence polarization; HPLC, high-performance liquid chromatography; GBM, glioblastoma; AML, acute myeloid leukaemia; ssDNA, single-stranded DNA; ssRNA, single-stranded RNA; HTS, high-throughput screening; 20m, 5-hydroxy-1-[4-((N-methylsulfamoyl)methyl)phenyl]-1H-pyrazole-3-carboxylic acid; PDCA, pyridine dicarboxylic acid; <sup>3</sup>H-m<sup>6</sup>A-ssRNA, 3H-monomethylated ss-RNA; ALK-04; DDO-2728, 4-(Trifluoromethyl)benzyl 4-(6-(2,6-dihydroxy-3-nitrobenzoyl)pyrazolo[1,5-a]pyrimidin-2-yl)benzoate; Ena15; Ena21; IOX1, 5-carboxy-8-hydroxyquinoline; MV1035, 2-methyl-3-propyl-5H-imidazo[1,2-c][1,3]benzoxazin-5-thione; NOG, N-oxalyglycine; NXT; PDB, Protein Data Bank; ZINC00546946; ZINC78774792.
